# Supplementary material
Source: PubMed Central journal article supplement (PMC5588864)
Supplement: NIHMS898802-supplement-2.pdf [file NIHMS898802-supplement-2.pdf]

## Supporting Information

### **Hedgehog Proteins Consume Steroidal CYP17A1 Antagonists: Potential Therapeutic Significance in Advanced Prostate Cancer**

Brandon M. Bordeau, Daniel A. Ciulla, and Brian P. Callahan<sup>\*[a]</sup>

cmdc\_201600238\_sm\_miscellaneous\_information.pdf

## **Supporting Information**

### **Table of Contents**

|                                         |            |
|-----------------------------------------|------------|
| <b>Supporting Figure 1</b>              | <b>p 2</b> |
| <b>Supporting Figure 2</b>              | <b>p 2</b> |
| <b>Supporting Figure 3</b>              | <b>p 3</b> |
| <b>Supporting Figure 4</b>              | <b>p 4</b> |
| <b>Supporting Materials and Methods</b> | <b>p 5</b> |
| <b>References</b>                       | <b>p 7</b> |

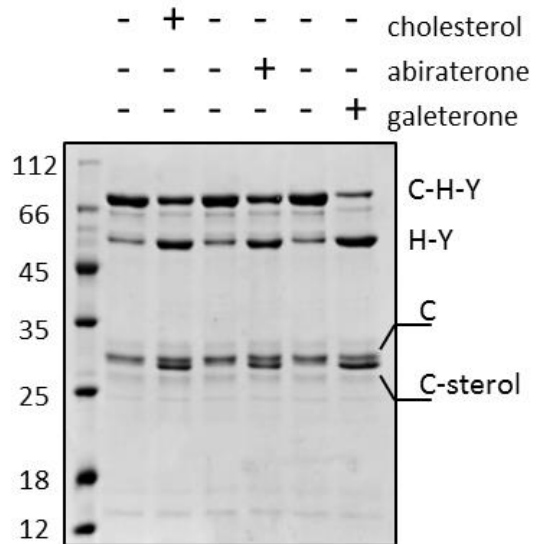

**Supporting Figure 1:** Cross validation of abiraterone and galeterone substrate activity. SDS-PAGE assay showing the activity of C-H-Y +/- sterols at 30 °C. Processing results

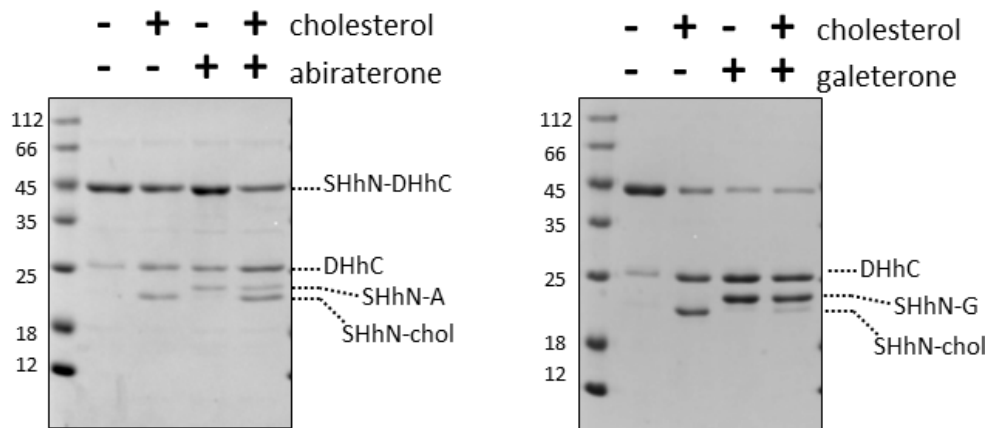

in the conversion of C-H-Y (86 kDa) into C-sterol (30 kDa) and H-Y (56 kDa).

**Supporting Figure 2:** Abiraterone and galeterone compete with cholesterol as substrates for hedgehog lipidation. Competition experiments used the chimeric precursor, SHhN-DHhC (1 μM) +/- sterols (25 x 10<sup>-6</sup> M).

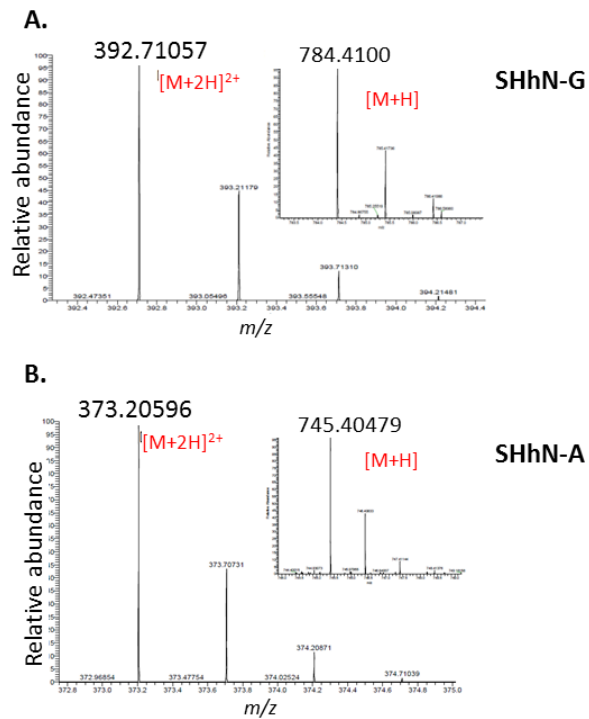

**Supporting Figure 3:** Characterization of galeterone and abiraterone conjugates by mass spectrometry. Expected/observed mass for the tryptic C-terminal fragment modified by abiraterone: 745.5/745.4; Expected/observed mass for the tryptic C-terminal fragment modified by galeterone: 784.3/784.4.

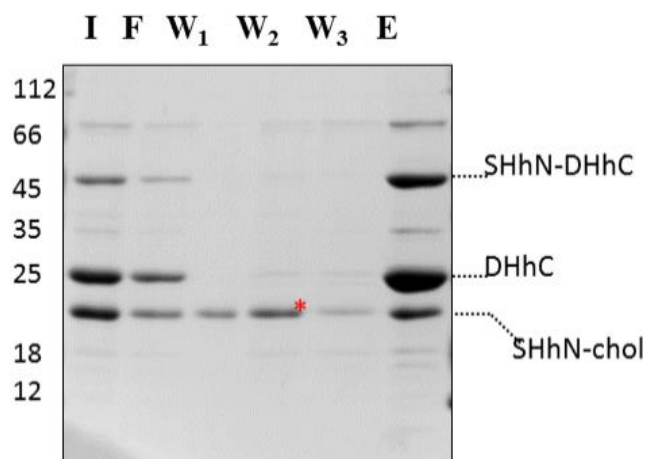

**Supporting Figure 4:** Analysis of Hh-sterol conjugates for cell-based signaling assays. Using the chimeric precursor, SHhN-DHhC, the protein was initially reacted with sterol (I); following dialysis and filtration, the sample was passed over a column with NiNTA resin (F); the resin was washed with imidazole containing buffer (W1-W3); unreacted precursor and DHhC were eluted (E). Samples containing SHhN were collected and analyzed by SDS-PAGE and RP-HPLC before use in the cell reporter assays.

|                    | $K_m$ ( $\mu\text{M}$ ) | $k_{max}$ $\times 10^{-3}$ ( $\text{sec}^{-1}$ ) | $t_{1/2}$ (min) |
|--------------------|-------------------------|--------------------------------------------------|-----------------|
| <b>cholesterol</b> | 1 +/- 0.2               | 1.6 +/- 0.1                                      | 7               |
| <b>abiraterone</b> | 12 +/- 5                | 2.1 +/- 0.1                                      | 5               |
| <b>galeterone</b>  | 3 +/- 0.6               | 12.9 +/- 2.2                                     | 1               |

**Supporting Table 1:** Kinetic parameters determined using C-H-Y ( $1 \times 10^{-7}$  M) precursor protein in Bis-tris buffered solution, pH 7.1, containing NaCl (0.1 M), TCEP ( $1 \times 10^{-3}$  M), EDTA ( $5 \times 10^{-3}$  M), and Fos-choline-12 ( $1.5 \times 10^{-3}$  M), at 30 °C. Values represent the mean of at least three independent experiments +/- standard deviation.

**Reagents:** Antibiotics, Isopropyl  $\beta$ -D-1-thiogalactopyranoside (IPTG), granulated bacterial broth, and buffers used for protein purification and characterization were obtained from Thermo Fisher Scientific; p-nitrophenyl phosphate was purchased from Sigma; C3H10T1/2 cells and growth media were obtained from ATCC. Restriction enzymes and DNA ligase were purchased from New England Biolabs. Sterols were also obtained commercially: Abiraterone and galeterone (Adooq Bioscience), cholesterol (Sigma). Working stocks of the sterols were prepared fresh in ethanol at a final concentration of 10 mM. Fos-choline-12 was purchased from Anatrache Inc.

**Hh signaling Assays:** Activity of Hh protein +/- conjugated sterol was assessed using the Hh responsive mouse embryonic cell line, C3H10T1/2 (ATCC # CCL-226) [1-4]. Cells were maintained in Eagles Minimum Essential Media with 10% FBS, penicillin/streptomycin (ATCC). Signaling assays were conducted using low passage cells (4-6th passage) in 96 well dishes (Corning #3995), at an initial concentration of  $5 \times 10^3$  cells/well. Following overnight incubation, adherent cells in 100  $\mu$ l of media were treated with serially diluted Hh protein from a 30  $\mu$ m stock in EMEM media, or an equivalent volume of EMEM. Selected wells were treated with purmorphamine (10  $\mu$ m, R&D Systems) as a positive control [5]. After 5 day incubation, media was removed, the cells were washed twice with Buffer A (200  $\mu$ l/well), once with Buffer B (100  $\mu$ l/well), followed by addition of Buffer C (100  $\mu$ l/well). To enhance lysis, cells were subjected to two freeze/thaw cycles (15 min -80  $^{\circ}$ C, 15 min 37  $^{\circ}$ C). Resulting cell extract was pipetted up and down 10x, before transferring to a 96-well clear bottom plate (Corning #3598) for assaying alkaline phosphatase (AP). Activity of AP was determined after adding 100  $\mu$ l of the chromogenic substrate p-nitrophenylphosphate (2 mg/ml in buffer C, made fresh). Product formation was monitored at 405 nm using a Biotek plate reader (28.5  $^{\circ}$ C). Final absorbance values at 405 nm were collected after 8 hrs, and normalized to total protein concentration for each well, determined separately by Bradford Assay. Buffers were prepared as follows: Buffer A: 20 mM  $\text{Na}_2\text{HPO}_4^{2-}$ , 150 mM NaCl pH 7.2; Buffer B: 50 mM Tris-HCl, 150 mM NaCl, pH 7.5; Buffer C: 100 mM Glycine 1 mM  $\text{MgCl}_2$  pH 9.0.

**Data Analysis:** Apparent EC50 values from dose-dependent cellular responses to added Hhs were calculated by non-linear regression to a three parameter equation (Graphpad Prism 6):  $Y = \text{Bottom} + (\text{Top} - \text{Bottom}) / (1 + 10^{-(\text{LogEC50} - X)})$ .

**Protein Expression:** Recombinant, His-tagged C-H-Y protein, used in the fluorescence activity assays was expressed and purified from *E. coli* MC1061 [6]; the chimeric His-tagged SHhN-DHhC construct, used for generating steroylated human ShhN was expressed and purified from *E. coli* BL21DE3 [7]. The plasmid used to generate steroylated Desert Hh, pet22b-Des\_HhN-DHhC, was prepared from pet22b-SHhN-DHhC using NdeI and NcoI site that flank the SHhN segment.

**Preparation of Hh-sterol conjugates:** We used in vitro autoprocessing activity of the chimeric precursor, SHhN-DHhC to prepare cholesterol-modified SHhN (SHhN-chol), abiraterone-modified SHhN (SHhN-A), galeterone-modified SHhN (SHhN-G), and sterol-free SHhN. A typical reaction (5 mls) contained ShhN-DHhC (10  $\mu$ M), sterol (250  $\mu$ M), Triton-X 100 detergent (0.4%), Bis-Tris buffer with added NaCl and TCEP. After 4 h at 25  $^{\circ}$ C, the reaction mixture was dialyzed at 4  $^{\circ}$ C for 18 h into PBS buffer (pH 7.2), filtered using 0.22  $\mu$ m (PVDF, Celltreat), then treated with NiNTA resin to remove unreacted SHhN-DHhC and product HhC. The SHhN polypeptide eluted in column wash buffer. Cholesterol-modified Desert Hh was prepared in a

similar fashion. Sterol-free SHhN was prepared by cleaving SHhN from DHhC using hydroxylamine.

In addition to SDS-PAGE, purity of the Hh-sterol conjugates was assessed by reverse phase HPLC. Samples were separated with a Harmony C4 column (300 Å, 25 cm x 4 mm, ES Industries) by gradient elution (A: water, 0.1% TFA; B: acetonitrile, 0.1% TFA). Effluent was monitored at 220 nm. Elution times for ShhN and SHhN-chol are in good agreement with the data of Baker *et al.* [8].

**Mass Spectroscopy:** Molecular masses of the SHhN-A and SHhN-G conjugates were determined by ESI-MS/MS at the Cornell Proteomics Facility. Following separation by SDS-PAGE, gel slices containing Hh were washed, reduced with dithiothreitol, alkylated by iodoacetamide, and then digested with trypsin [9]. Digested peptides were extracted twice with 70 µl of 50% acetonitrile, 5% Formic Acid and once with 70 µl of 90% acetonitrile, 5% Formic acid. Lyophilized extracts were reconstituted in 20 µL of 0.5% FA for nanoLC-ESI-MS/MS analysis, using a LTQ-Orbitrap Elite mass spectrometer (Thermo-Fisher Scientific, San Jose, CA) equipped with a Dionex UltiMate3000RSLCnano system (Thermo, Sunnyvale, CA) and “CorConneX” nano ion source device (CorSolutions LLC, Ithaca, NY). The Orbitrap calibration and nanoLC-MS/MS operation have been described [10]. The instrument was operated in positive ion mode with nano spray voltage set at 1.5 kV and source temperature at 250 °C. All data are acquired with Xcalibur 2.2 software (Thermo-Fisher Scientific, San Jose, CA).

#### **Kinetics of Hh autoprocessing:**

*FRET* assay: Activity of Hh in the presence of cholesterol and the alternative substrates, galeterone and abiraterone, was determined optically using C-H-Y, a FRET-active Hh precursor protein. Details of the assay followed Owen *et al.* [7] with the exception that Fos-Choline-12, instead of Triton-X 100, was used for solubilizing the sterols. This substitution results in a 10-20 fold enhancement in Hh self-lipidation activity (manuscript in preparation).

*Gel* assay: To complement the optical assay, Hh activity was assessed by SDS-PAGE, which allows monitoring the appearance of DHhC and SHhN-sterol along with the loss of precursor SHhN-DHhC [7, 11]. Gels images were captured using BioRad Gel Doc EZ system.

## REFERENCES:

1. Kinto, N., et al., *Fibroblasts expressing Sonic hedgehog induce osteoblast differentiation and ectopic bone formation*. FEBS letters, 1997. 404(2-3): p. 319-23.
2. Pepinsky, R.B., et al., *Identification of a palmitic acid-modified form of human Sonic hedgehog*. The Journal of biological chemistry, 1998. 273(22): p. 14037-45.
3. Murone, M., A. Rosenthal, and F.J. de Sauvage, *Sonic hedgehog signaling by the patched-smoothed receptor complex*. Current biology : CB, 1999. 9(2): p. 76-84.
4. Taylor, F.R., et al., *Enhanced potency of human Sonic hedgehog by hydrophobic modification*. Biochemistry, 2001. 40(14): p. 4359-71.
5. Wu, X., et al., *Purmorphamine induces osteogenesis by activation of the hedgehog signaling pathway*. Chemistry & Biology, 2004. 11(9): p. 1229-38.
6. Owen, T.S., et al., *Active site targeting of hedgehog precursor protein with phenylarsine oxide*. Chembiochem : a European journal of chemical biology, 2015. 16(1): p. 55-8.
7. Owen, T.S., et al., *Forster resonance energy transfer-based cholesterolysis assay identifies a novel hedgehog inhibitor*. Analytical biochemistry, 2015. 488: p. 1-5.
8. Baker, D.P., F.R. Taylor, and R.B. Pepinsky, *Purifying the hedgehog protein and its variants*. Methods in molecular biology, 2007. 397: p. 1-22.
9. Yang, Y., et al., *Development of an integrated approach for evaluation of 2-D gel image analysis: impact of multiple proteins in single spots on comparative proteomics in conventional 2-D gel/MALDI workflow*. Electrophoresis, 2007. 28(12): p. 2080-94.
10. Yang, Y., et al., *Evaluation of different multidimensional LC-MS/MS pipelines for isobaric tags for relative and absolute quantitation (iTRAQ)-based proteomic analysis of potato tubers in response to cold storage*. Journal of proteome research, 2011. 10(10): p. 4647-60.
11. Xie, J., et al., *Zinc inhibits Hedgehog autoprocessing: linking zinc deficiency with Hedgehog activation*. The Journal of biological chemistry, 2015. 290(18): p. 11591-600.
